# Supplementary material for: How training loads in the preparation and competitive period affect the biochemical indicators of training stress in youth soccer players?
Source: PeerJ. 2022 May 5;10:e13367. doi: 10.7717/peerj.13367 (PMC9080429; doi:10.7717/peerj.13367)
Supplement: Supplemental Information 1 — All analyzed indicators in 4 test dates and in specific time intervals. [file peerj-10-13367-s001.xlsx]

## Sheet: Raw data
Lp.	No.	RPE T0-T1	RPE T1-T2	RPE T2-T3	COR_0	COR_1	COR_2	COR_3	BDNF_0	BDNF_1	BDNF_2	BDNF_3	SER_0	SER_1	SER_2	SER_3	CK_0	CK_1	CK_2	CK_3
1	2	15851	13715	9963	206.723	272.901	240.206	206.325	4.958	8.173	4.558	4.884	82.398	73.822	72.07	46.071	165	239	172	198
2	3	13475	14191	12115	245.09	317.33	382.543	322.948	4.445	3.679	3.087	4.387	109.859	238.427	213.725	207.035	113	232	294	154
3	6	16448	12009	13294	225.309	280.49	257.804	215.687	23.997	28.007	20.831	21.368	46.738	51.763	38.262	45.165	112	262	218	182
4	7	14859	12023	8732	175.35	278.242	298.606	301.775	13.331	12.48	11.35	13.544	51.117	107.888	112.907	177.52	119	182	170	233
5	9	16772	17312	11666	195.099	235.999	177.927	253.169	8.327	9.183	9.036	8.295	140.171	259.13	129	202.352	103	166	231	173
6	11	15788	14554	13766	140.863	337.903	329.714	174.496	10.339	12.228	10.933	10.102	184.671	109.306	85.843	41.454	116	149	266	119
7	13	13678	14753	12594	116.551	313.626	170.346	295.955	14.942	13.702	13.864	14.314	89.159	96.334	120.211	84.873	141	243	210	144
8	16	13737	13055	15300	172.405	194.835	161.04	200.418	3.826	8.901	4.721	5.564	154.73	231.745	296.932	188.728	179	178	172	124
9	17	14319	17044	13755	179.2	206.837	346.788	164.303	11.574	11.424	10.676	11.524	75.192	283.858	199.843	124.299	200	273	124	203
10	18	16126	17308	13749	146.962	132.614	163.466	162.168	6.077	11.082	6.4	6.65	121.049	226.241	122.201	127.427	144	260	137	163
11	20	16375	15445	14606	97.474	138.443	129.164	126.586	13.933	14.2	13.715	11.54	149.441	190.166	79.339	71.574	134	217	113	130
12	21	15540	13643	12045	201.735	189.605	165.499	202.898	4.505	9.365	4.476	4.799	166.204	256.447	183.857	168.073	186	226	150	100
13	22	14105	16139	15919	140.404	171.059	200.691	168.36	6.341	6.048	6.047	5.846	142.224	183.844	180.601	141.803	145	150	216	183
14	23	13573	13317	13329	127.445	88.24	116.609	181.874	7.651	13.075	8.041	8.91	278.352	222.722	205.879	238.896	174	191	271	358
15	26	14010	14698	13620	142.482	203.622	162.152	259.736	15.193	11.179	6.761	6.346	181.288	177.412	178.504	137.042	243	255	163	256
16	27	16819	14529	14291	178.444	230.305	106.022	262.179	15.854	27.372	28.207	27.679	271.65	232.524	241.491	275.472	118	286	244	286
17	28	16123	15204	13556	158.317	223.149	175.461	187.24	5.993	5.888	6.685	5.468	208.58	159.339	257.538	136.4	222	192	263	243
18	29	15079	14455	12565	127.374	173.993	169.67	255.285	5.93	7.582	6.794	6.924	190.398	274.9	233.224	188.088	111	235	210	235
